# Supplementary material for: New Three-Dimensional Porous Electrode Concept: Vertically-Aligned Carbon Nanotubes Directly Grown on Embroidered Copper Structures
Source: Nanomaterials (Basel). 2017 Dec 11;7(12):438. doi: 10.3390/nano7120438 (PMC5746928; doi:10.3390/nano7120438)
Supplement: Supplementary file 1 [file nanomaterials-07-00438-s001.pdf]

## Supplementary Material:

# New three-dimensional porous electrode concept: vertically-aligned carbon nanotubes directly growth on embroidered copper structures

Noemí Aguiló-Aguayo <sup>1,\*</sup>, Roger Amade <sup>2,3</sup>, Shahzad Hussain <sup>2</sup>, Enric Bertran <sup>2,3</sup> and Thomas Bechtold <sup>1</sup>

<sup>1</sup> Research Institute of Textile Chemistry and Textile Physics, University of Innsbruck, Hoechststrasse 73, Dornbirn 6850, Austria; thomas.bechtold@uibk.ac.at

<sup>2</sup> FEMAN Group, Departament de Física Aplicada, Universitat de Barcelona, c/Martí i Franquès 1, 08028 Barcelona, Catalonia, Spain; r.amade@ub.edu (R.A.); sha.awan@hotmail.com (S.H.); ebertran@ub.edu (E.B.)

<sup>3</sup> Institute of Nanoscience and Nanotechnology (IN2UB), Universitat de Barcelona, c/Martí i Franquès 1, 08028 Barcelona, Catalonia, Spain

\* Correspondence: noemi.aguilo-aguayo@uibk.ac.at or noeaguilo@gmail.com or textilchemie@uibk.ac.at; Tel.: +43-5572-28533-583

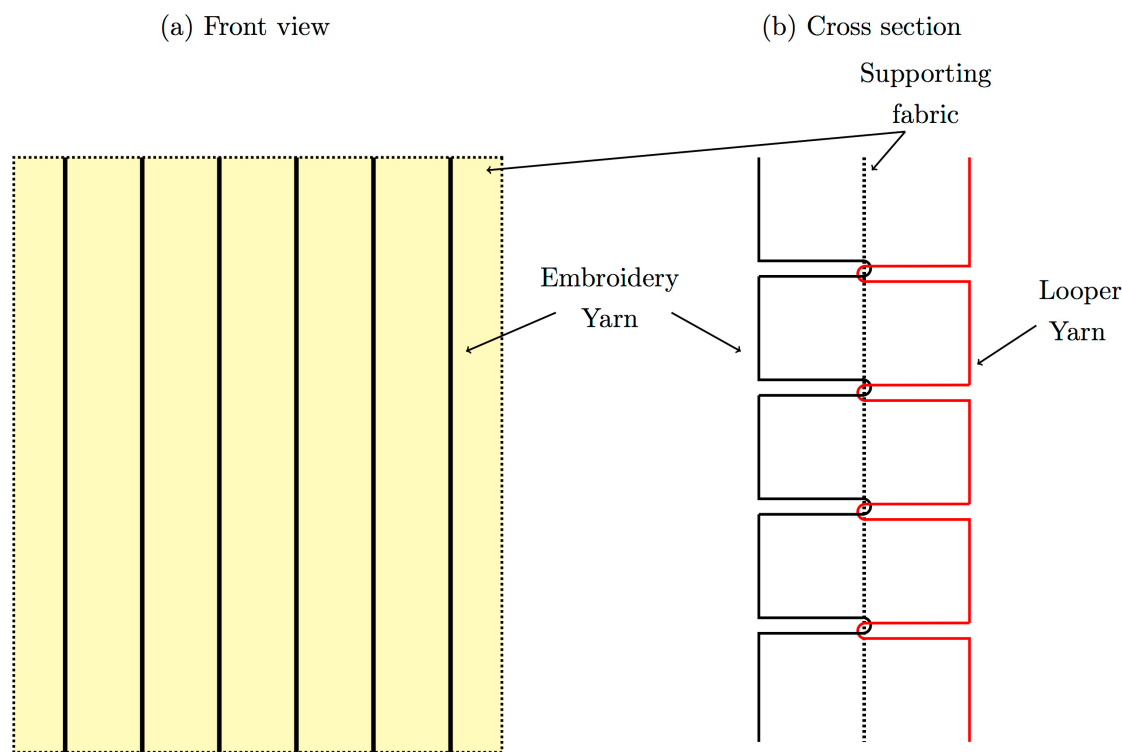

**Figure S1.** Schematic drawing of an embroidered structure with a layout of one layer. Cu wires are used as embroidery and looper yarns. (a) Front view showing the arrangement of one layer with vertical wires; (b) Cross section showing the lockstitching technique, and the arrangement of the embroidery and looper yarns.

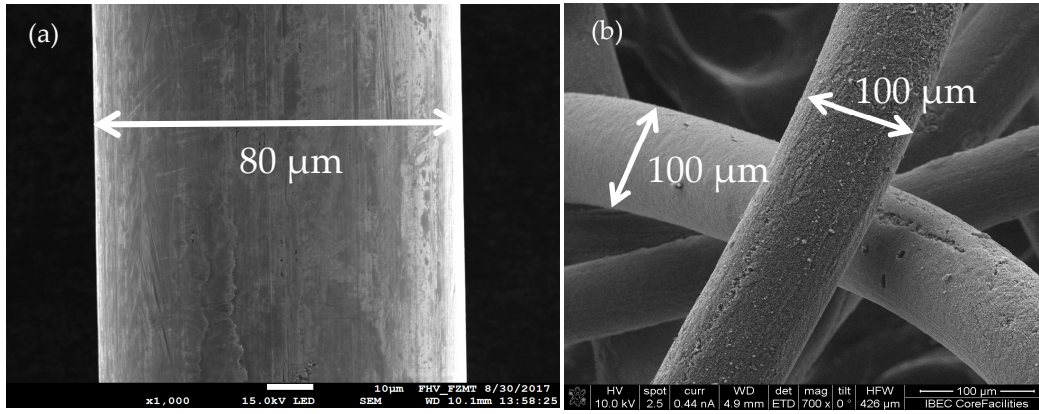

**Figure S2.** (a) SEM image showing the Cu wire used for embroidery with a diameter of 80 μm; (b) SEM image of the Cu wires with VA-CNTs. The final diameter is about 100 μm, indicating an average VA-CNT length of about 10 μm.

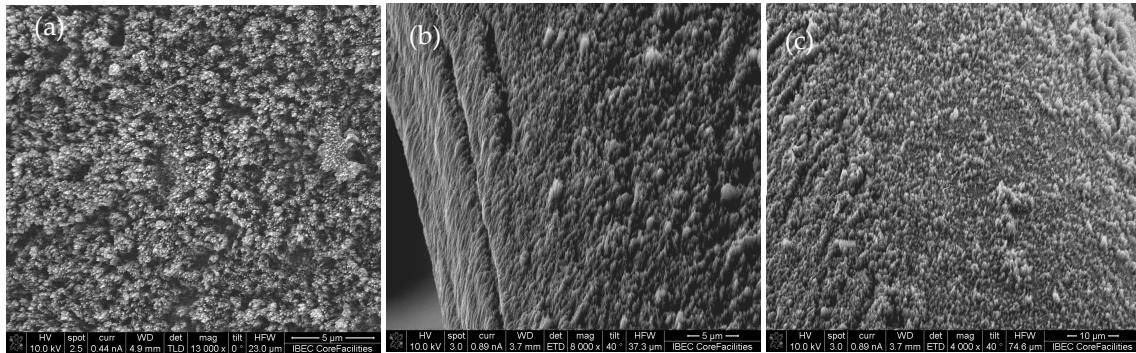

**Figure S3.** SEM images of the Cu wire with VA-CNTs from different areas: (a) front; (b) side and (c) backside with respect to the plasma. CNTs showed a preferential growth in the vertical direction. Shorter VA-CNTs were observed in the backside.

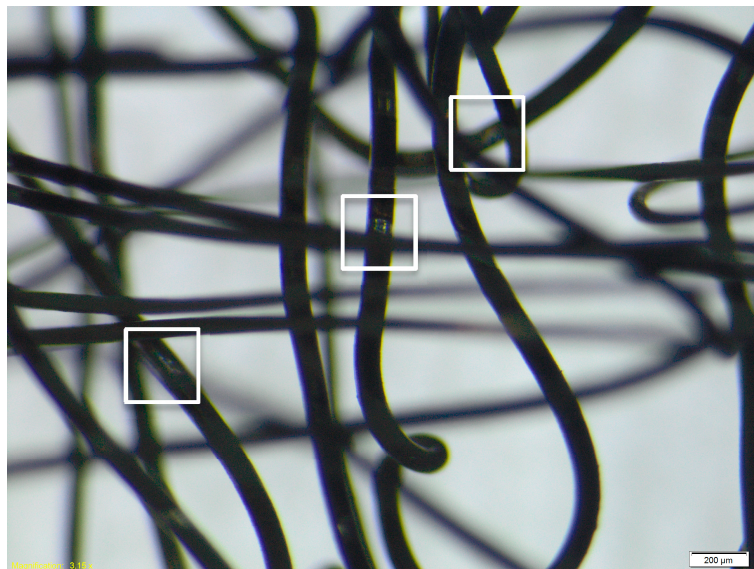

**Figure S4.** Photomicrograph of the embroidered structure after the growth of VA-CNTs. Some areas where Cu wires crossed (marked with a white rectangle) seem to be semi-completely covered by VA-CNTs.

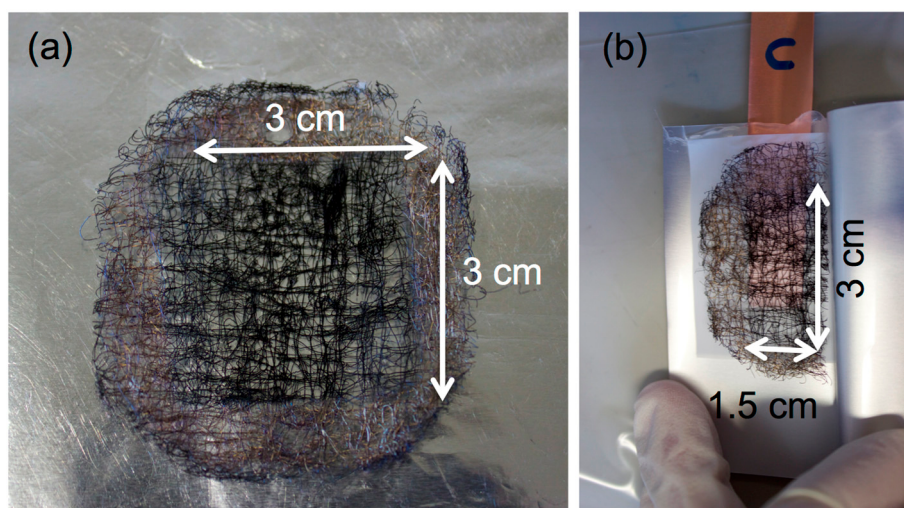

**Figure S5.** (a) Growth of VA-CNTs on  $3 \times 3 \text{ cm}^2$  embroidered Cu current collectors; (b) Preparation of a half-pouch cell of  $1.5 \times 3 \text{ cm}^2$ .
